# Supplementary material for: Facile synthesis of a dimeric titanium(iv) complex with terminal TiO moieties and its application as a catalyst for the cycloaddition reaction of CO2to epoxides
Source: Royal Society of Chemistry journal article supplement (doi:10.1039/c6ra23255h), 2016-01-01
Supplement: c6ra23255h1.pdf [file c6ra23255h1.pdf]

## SUPPORTING INFORMATION

### **Facile Synthesis of Dimeric Titanium (IV) Complex with Terminal Ti=O Moiety and Its Application as a Catalyst for Cycloaddition Reaction of CO<sub>2</sub> to Epoxides**

**Hyejin Kim,<sup>‡a</sup> Sung Ho Choi,<sup>‡a</sup> Duseong Ahn,<sup>a</sup> Yoseph Kim,<sup>a</sup> Ji Yeon Ryu,<sup>b</sup> Junseong Lee<sup>\*b</sup>  
and Youngjo Kim<sup>\*a</sup>**

<sup>a</sup> Department of Chemistry and BK21+ Program Research Team, Chungbuk National University, Cheongju, Chungbuk 28644, Republic of Korea

<sup>b</sup> Department of Chemistry, Chonnam National University, Gwangju 61186, Republic of Korea

<sup>‡</sup> The first and second authors contributed equally to the work.

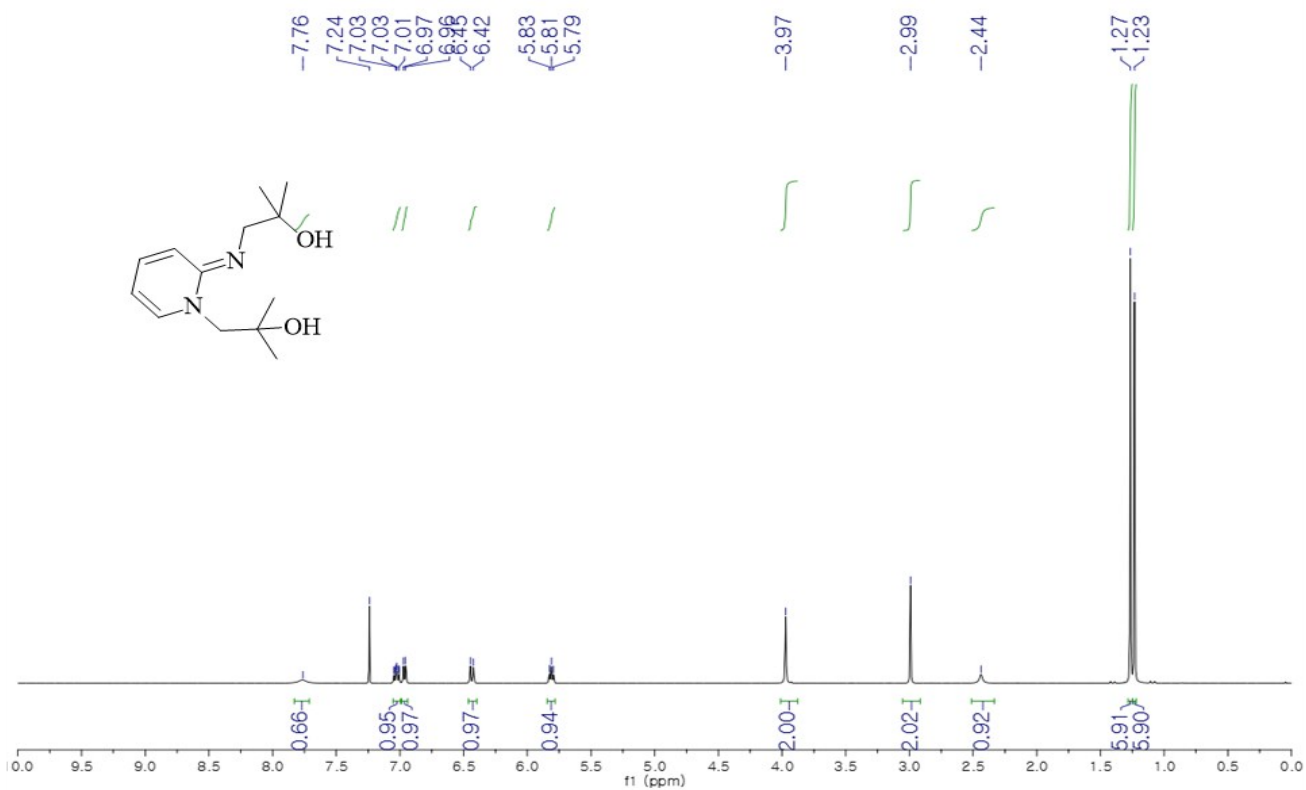

**Figure S1.**  $^1\text{H}$  NMR spectrum of  $\text{HOCMe}_2\text{CH}_2\text{NC}_5\text{H}_4\text{NCH}_2\text{CMe}_2\text{OH}$  ( $\text{LH}_2$ ) in  $\text{CDCl}_3$

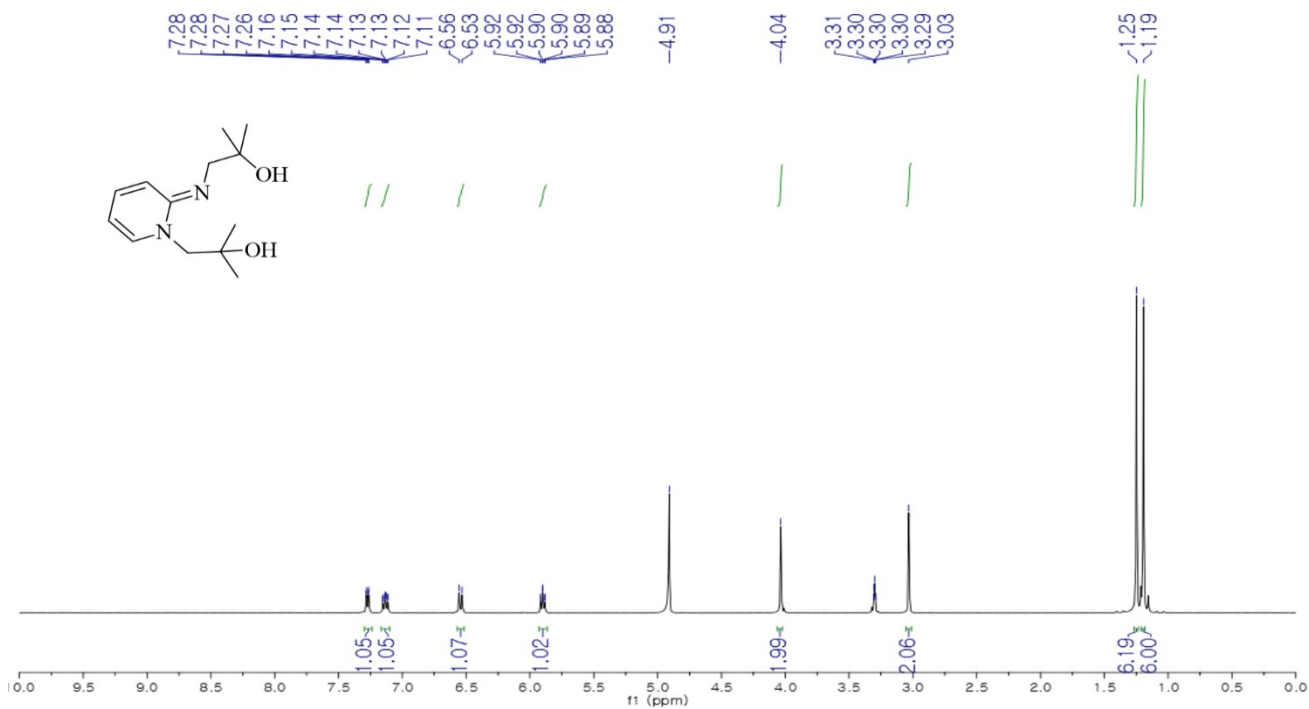

**Figure S2.**  $^1\text{H}$  NMR spectrum of  $\text{HOCMe}_2\text{CH}_2\text{NC}_5\text{H}_4\text{NCH}_2\text{CMe}_2\text{OH}$  ( $\text{LH}_2$ ) in  $\text{CD}_3\text{OD}$

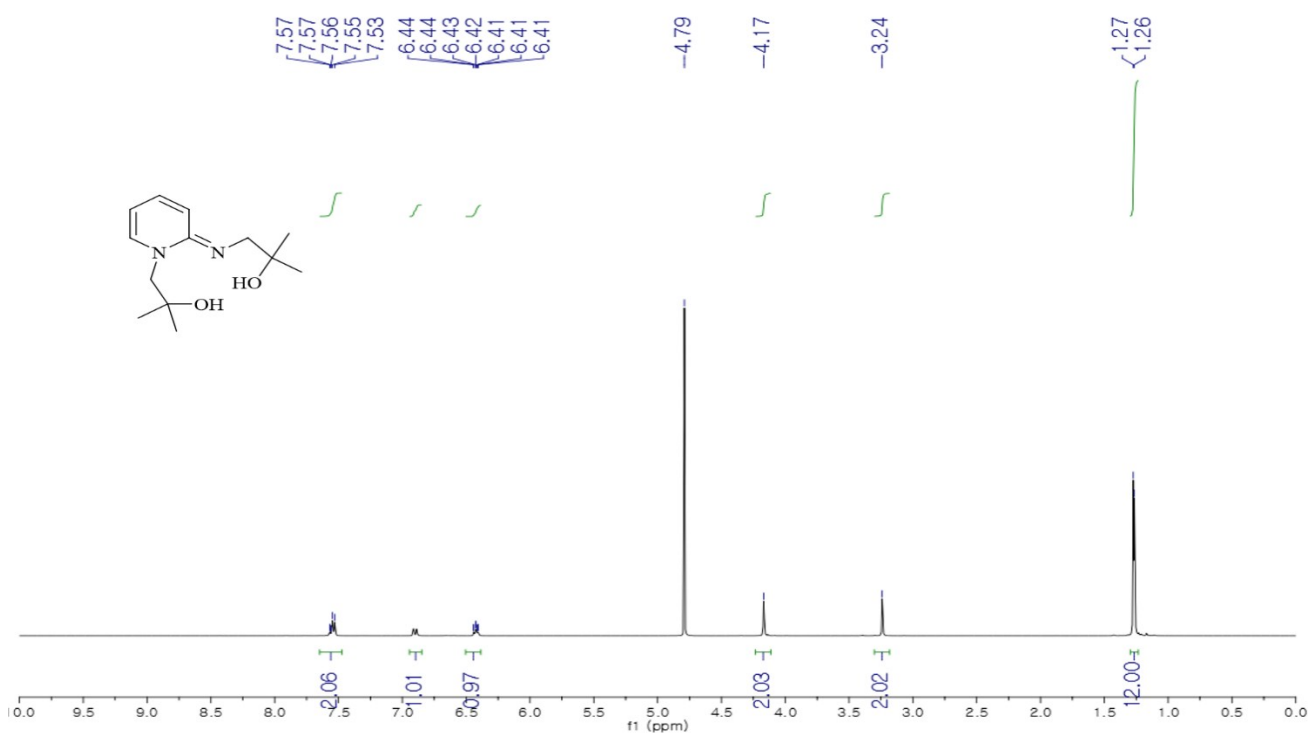

**Figure S3.**  $^1\text{H}$  NMR spectrum of  $\text{HOCMe}_2\text{CH}_2\text{NC}_5\text{H}_4\text{NCH}_2\text{CMe}_2\text{OH}$  ( $\text{LH}_2$ ) in  $\text{D}_2\text{O}$

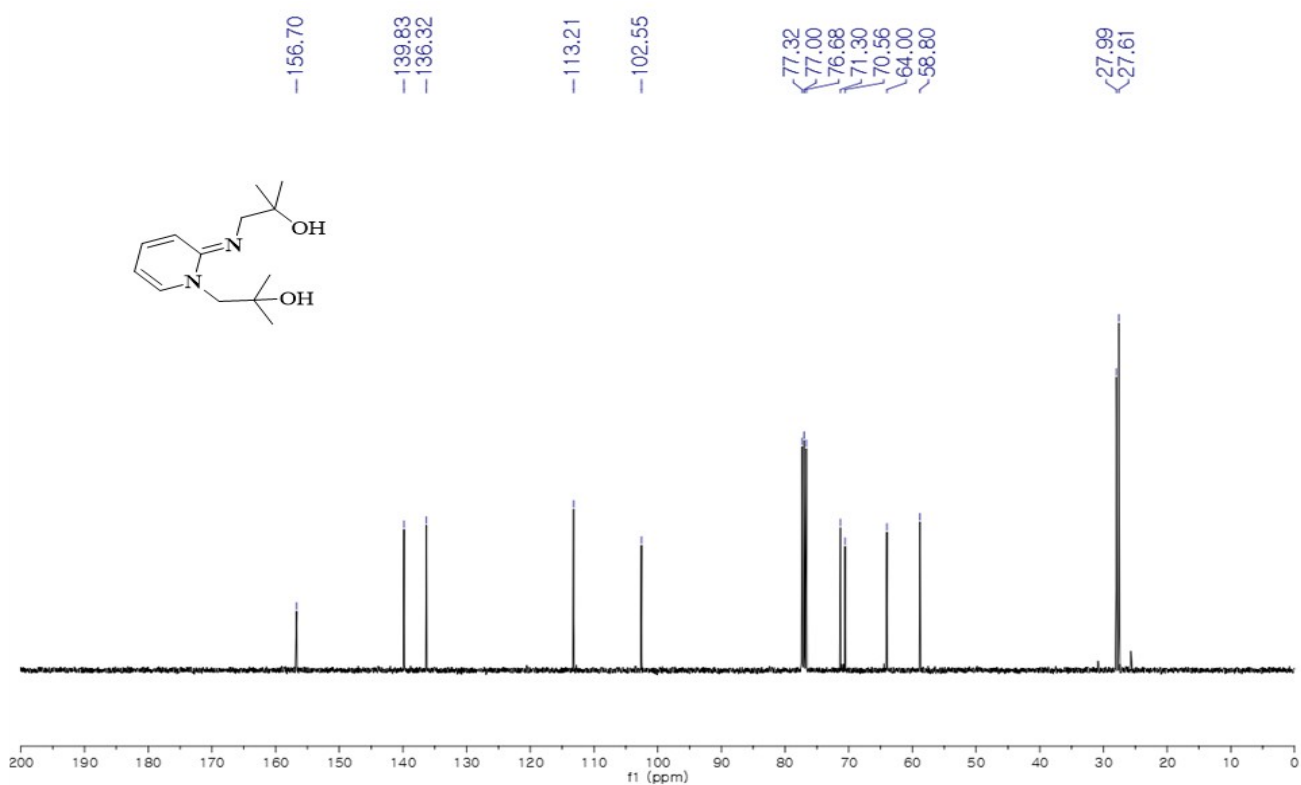

**Figure S4.**  $^{13}\text{C}$  NMR spectrum of  $\text{HOCMe}_2\text{CH}_2\text{NC}_5\text{H}_4\text{NCH}_2\text{CMe}_2\text{OH}$  ( $\text{LH}_2$ ) in  $\text{CDCl}_3$

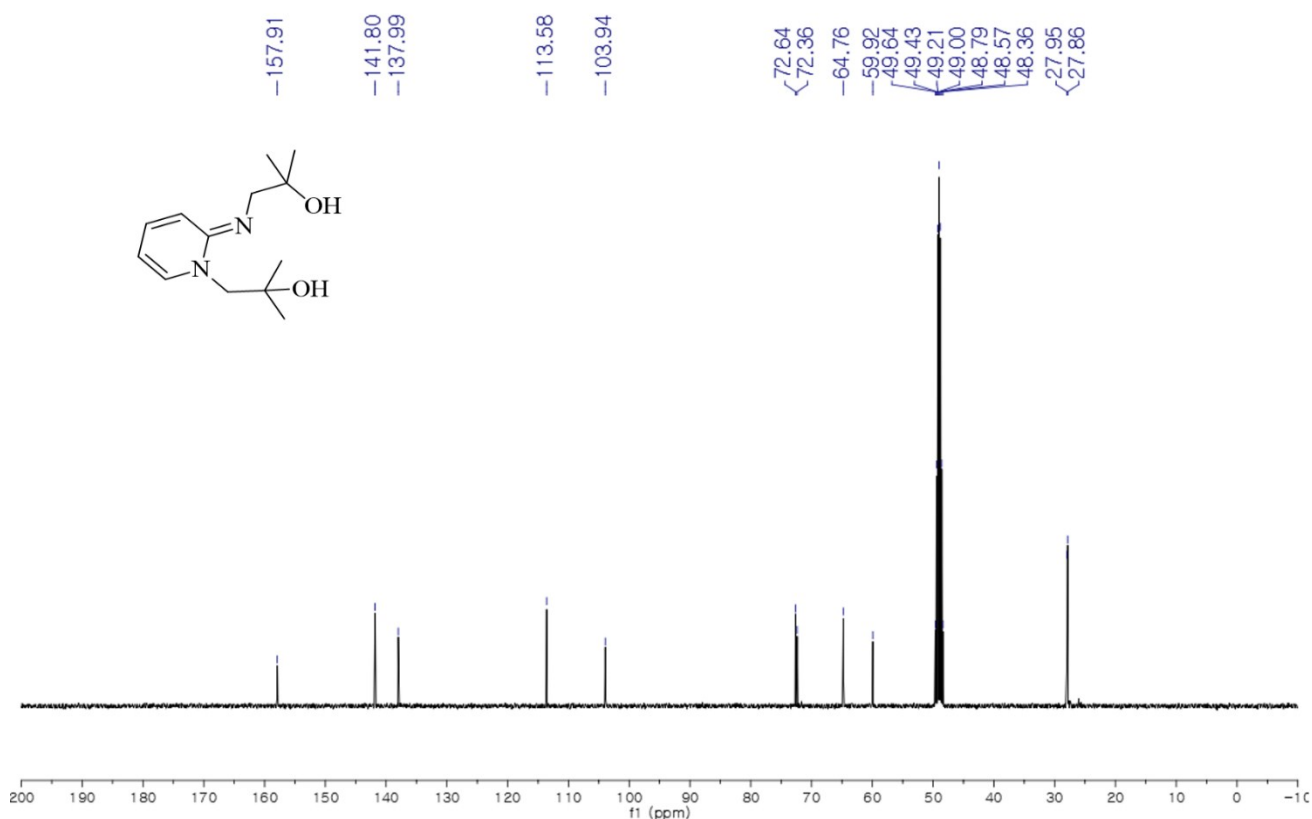

**Figure S5.**  $^{13}\text{C}$  NMR spectrum of  $\text{HOCMe}_2\text{CH}_2\text{NC}_5\text{H}_4\text{NCH}_2\text{CMe}_2\text{OH}$  ( $\text{LH}_2$ ) in  $\text{CD}_3\text{OD}$

**$\text{C}_{13}\text{H}_{22}\text{N}_2\text{O}_2$ ,  $\text{M}+\text{nH}$ , 239.18**

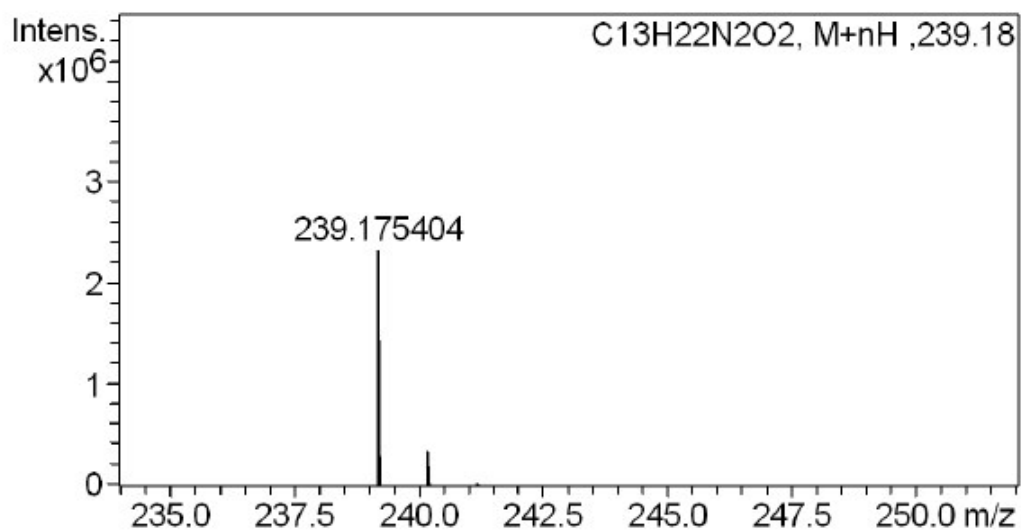

**Figure S6.** HRMS Spectrum of  $\text{HOCMe}_2\text{CH}_2\text{NC}_5\text{H}_4\text{NCH}_2\text{CMe}_2\text{OH}$  ( $\text{LH}_2$ )  
(HRMS  $m/z$  calcd for  $\text{C}_{13}\text{H}_{22}\text{N}_2\text{O}_2$  239.1760, found 239.1754.)

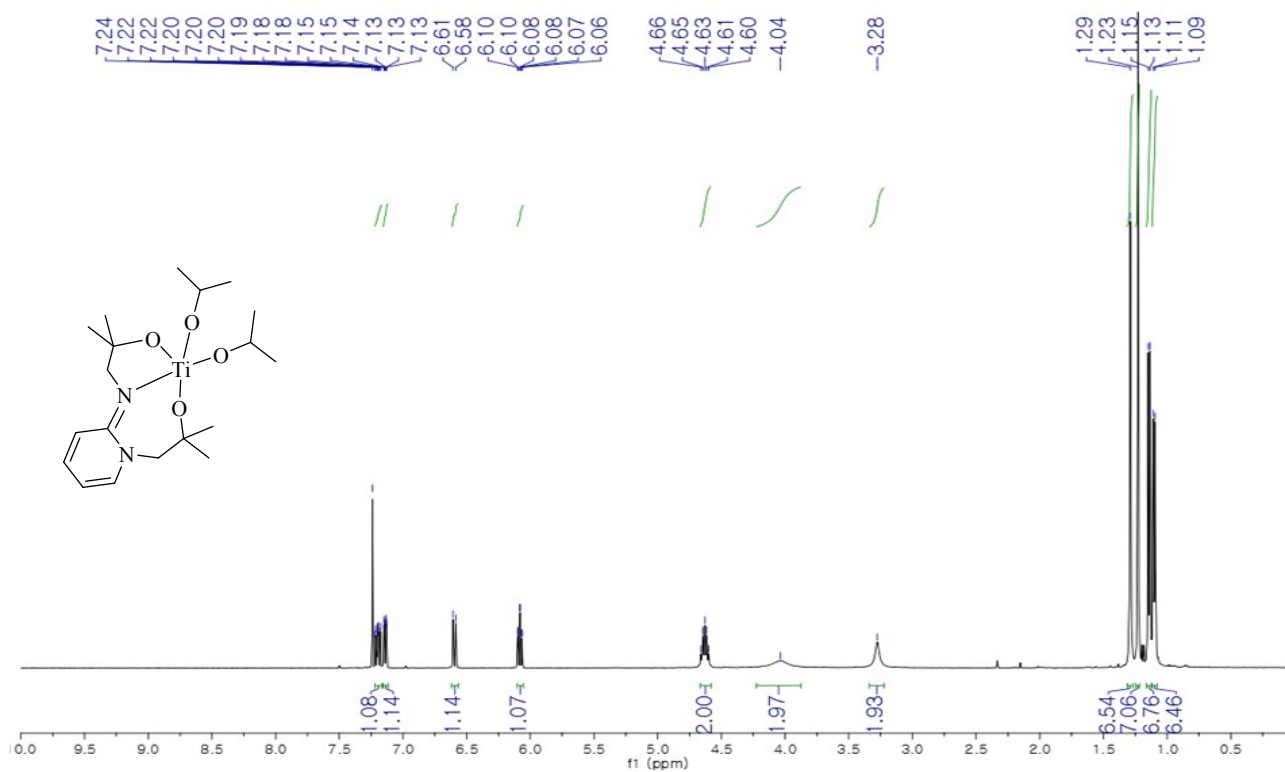

**Figure S7.**  $^1\text{H}$  NMR spectrum of  $\text{LTi}(\text{O-}i\text{Pr})_2$  (1) in  $\text{CDCl}_3$

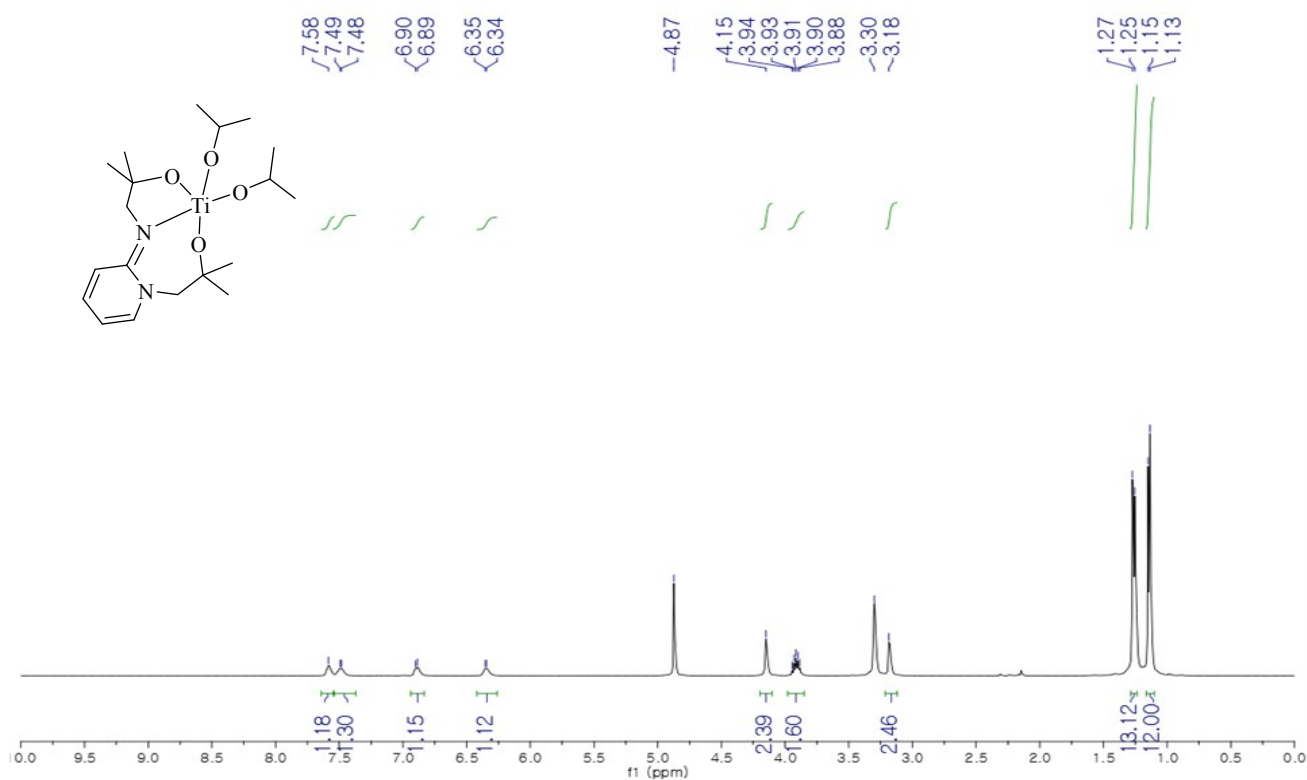

**Figure S8.**  $^1\text{H}$  NMR spectrum of  $\text{LTi}(\text{O-}i\text{Pr})_2$  (1) in  $\text{CD}_3\text{OD}$

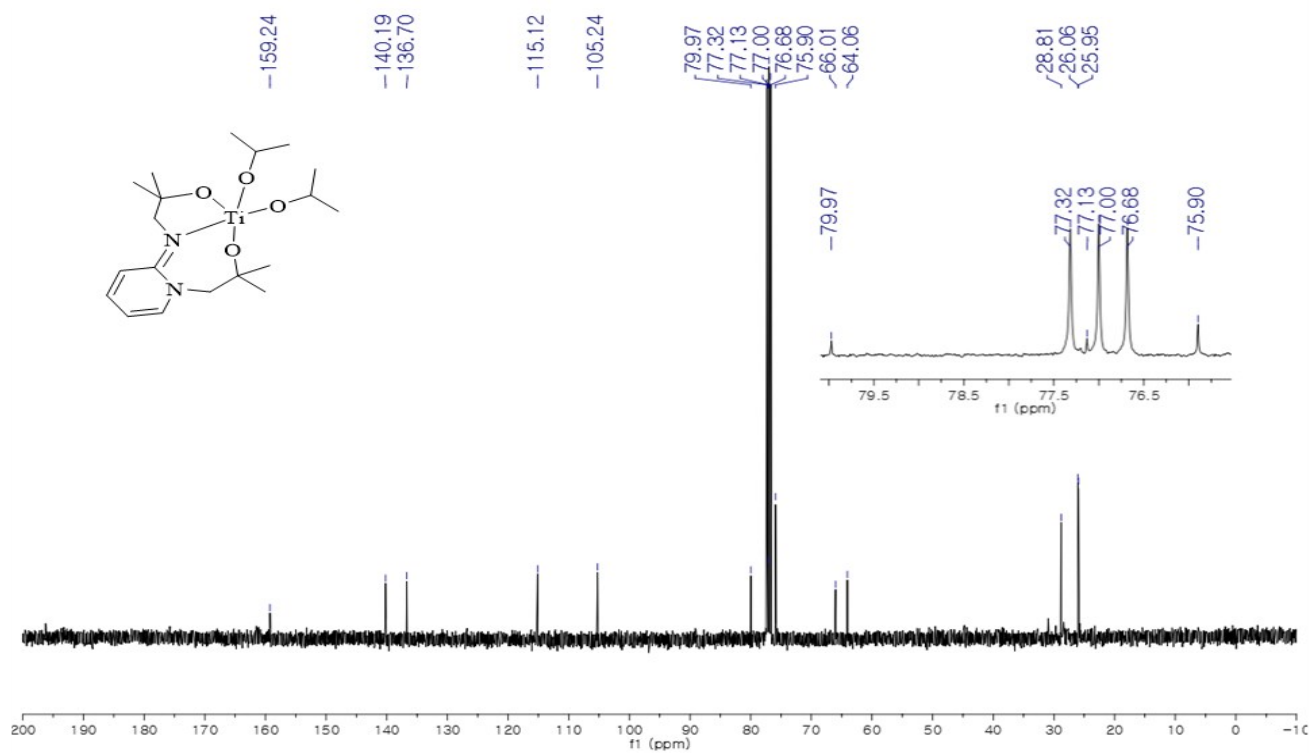

**Figure S9.** <sup>13</sup>C NMR spectrum of LTi(O-*i*Pr)<sub>2</sub> (1) in CDCl<sub>3</sub>

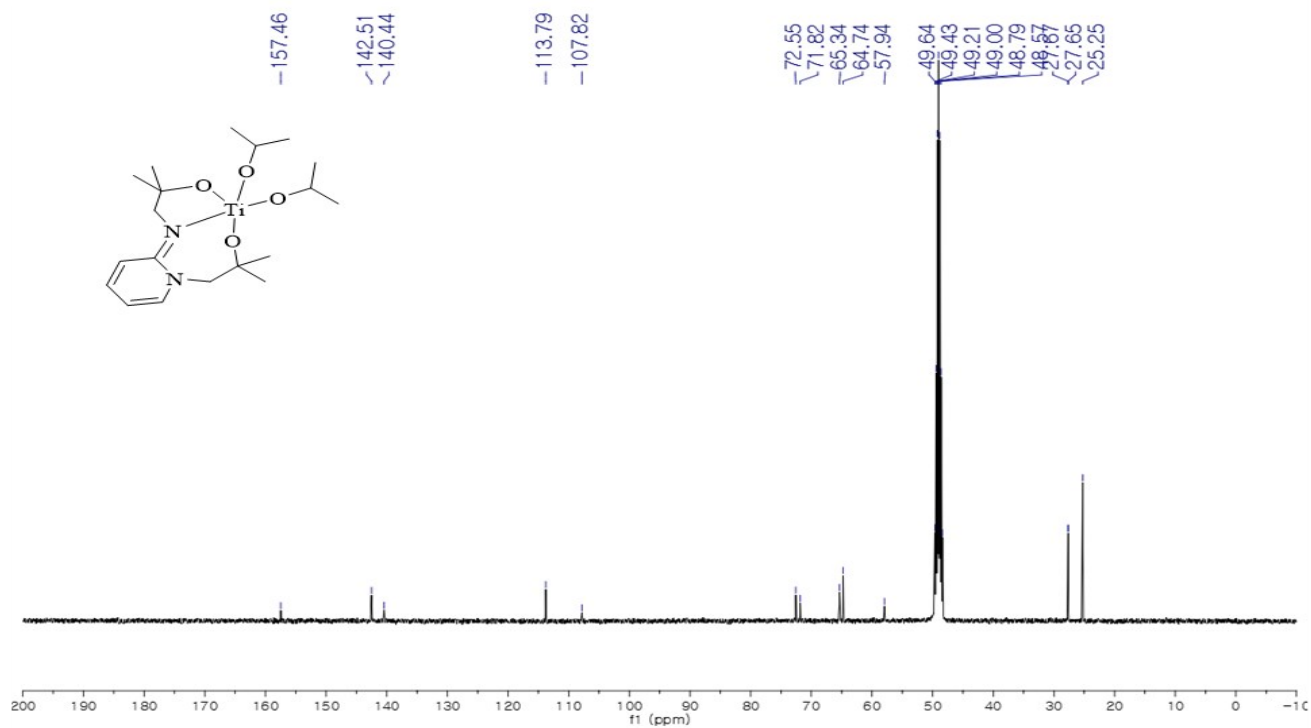

**Figure S10.** <sup>13</sup>C NMR spectrum of LTi(O-*i*Pr)<sub>2</sub> (1) in CD<sub>3</sub>OD

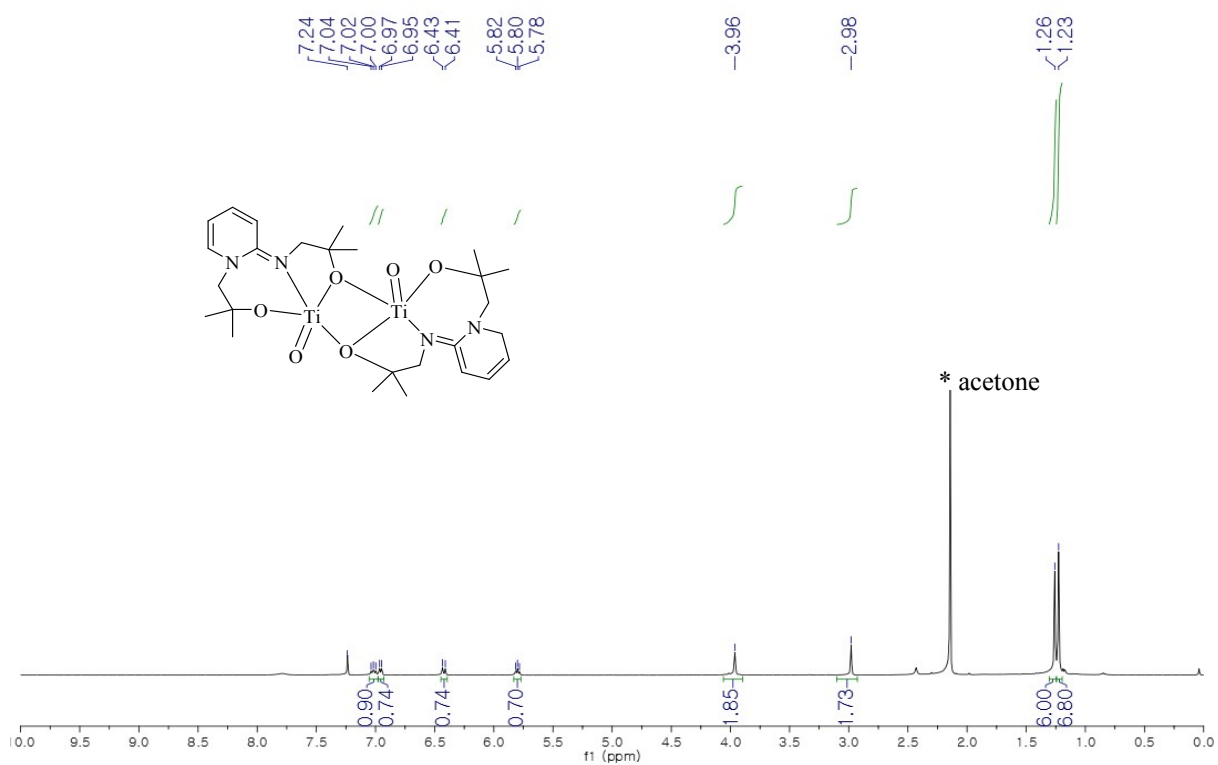

**Figure S11.**  $^1H$  NMR spectrum of  $[LTi(=O)]_2$  (2) in  $CDCl_3$

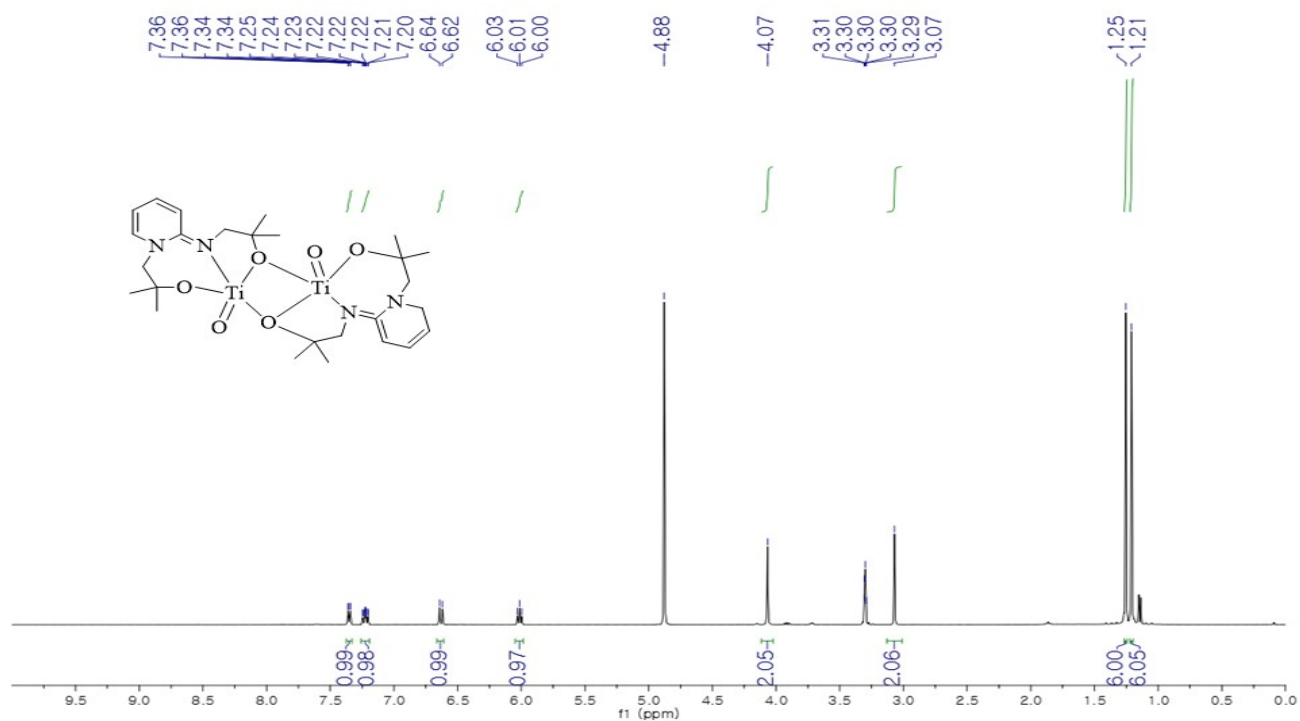

**Figure S12.**  $^1H$  NMR spectrum of  $[LTi(=O)]_2$  (2) in  $CD_3OD$

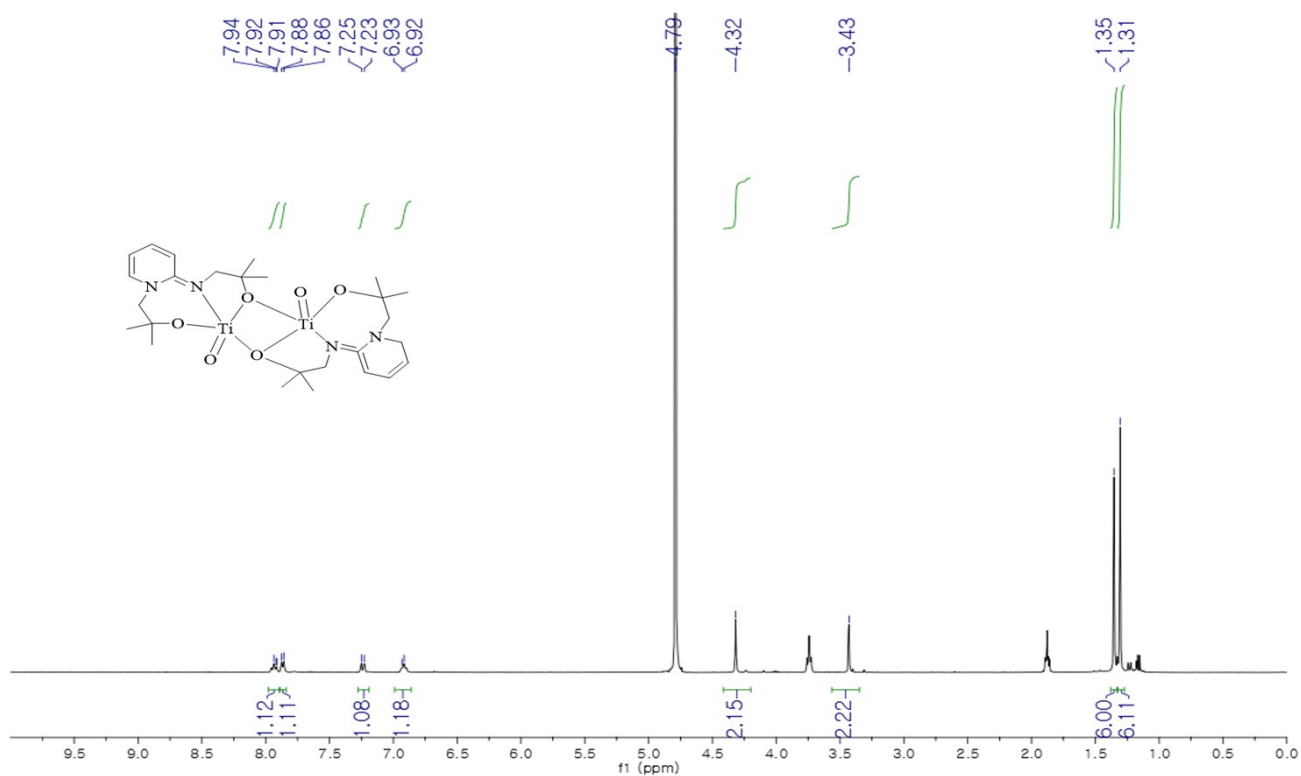

**Figure S13.**  $^1H$  NMR spectrum of  $[LTi(=O)]_2$  (2) in  $D_2O$

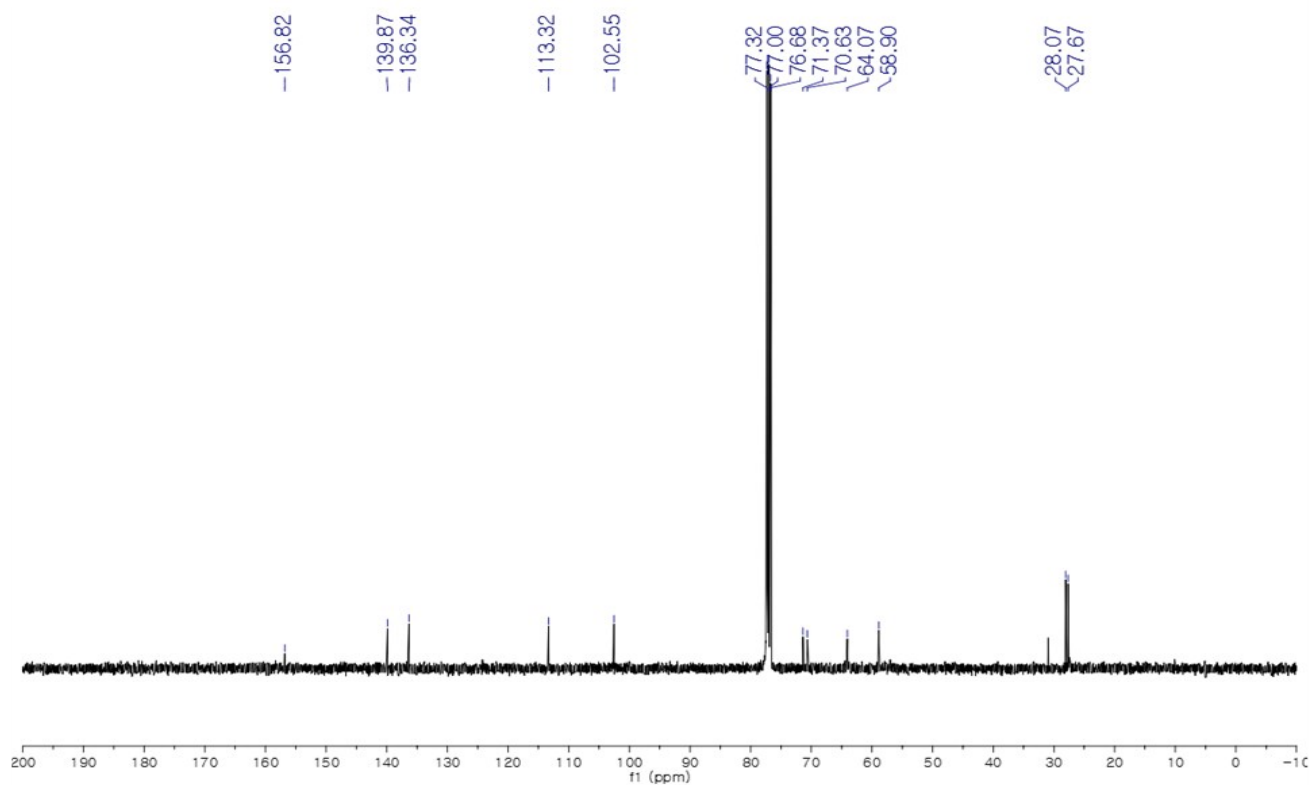

**Figure S14.**  $^{13}C$  NMR spectrum of  $[LTi(=O)]_2$  (2) in  $CDCl_3$

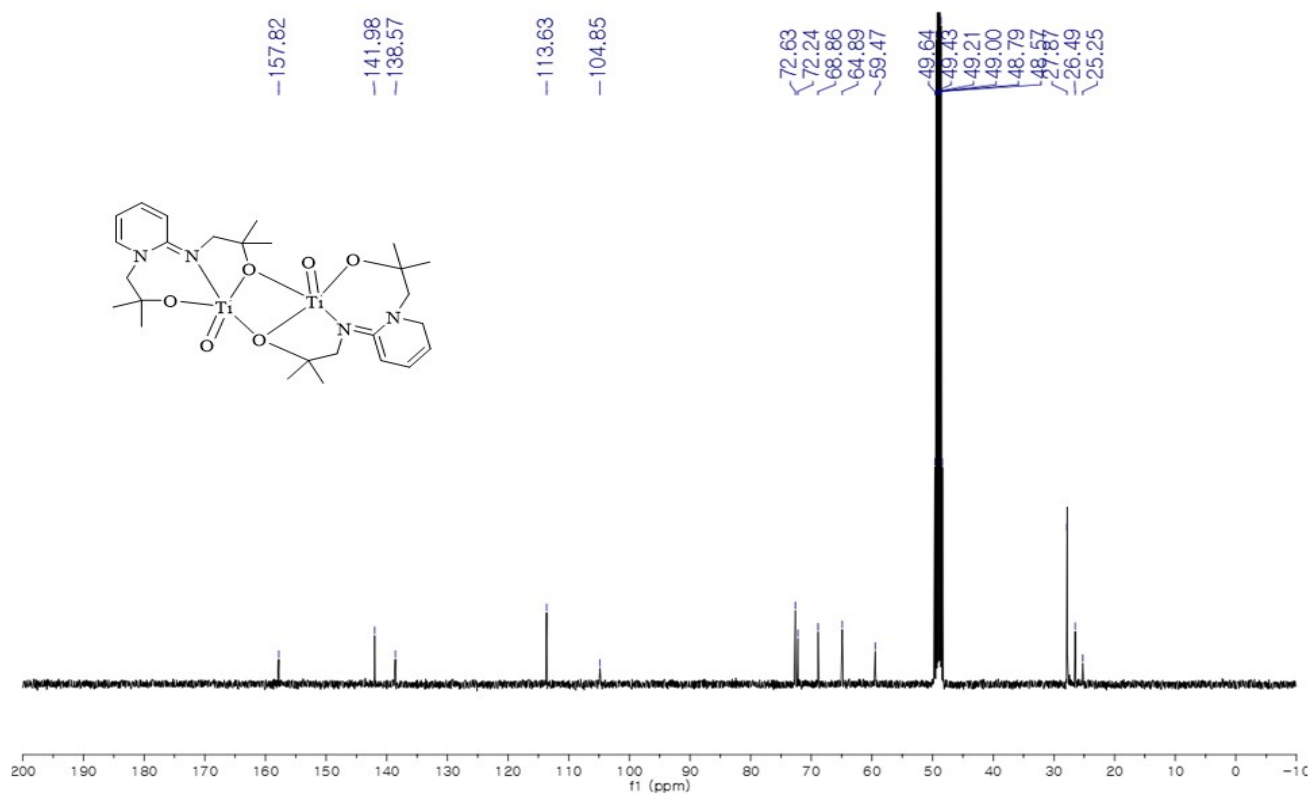

**Figure S15.**  $^{13}C$  NMR spectrum of  $[LTi(=O)]_2$  (2) in  $CD_3OD$

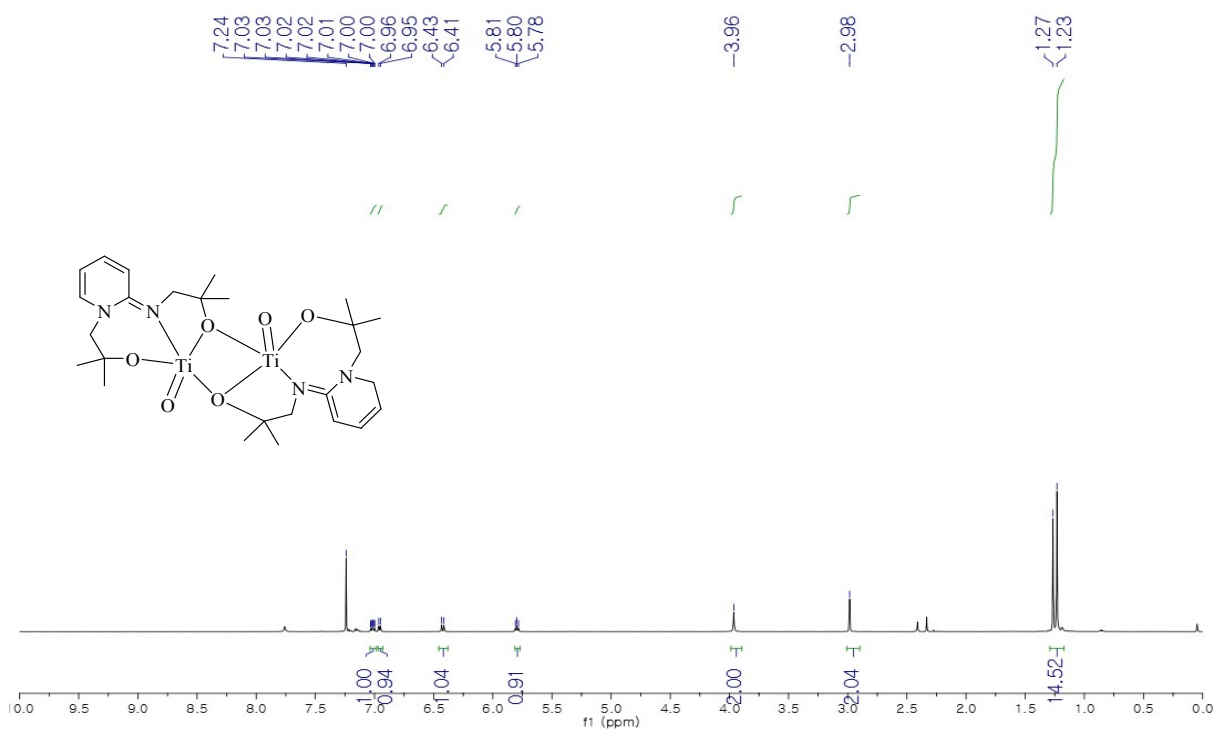

**Figure S16.**  $^1H$  NMR spectrum in  $CDCl_3$  for the compound obtained after wet air bubbling of  $LTi(O-iPr)_2$  (1)

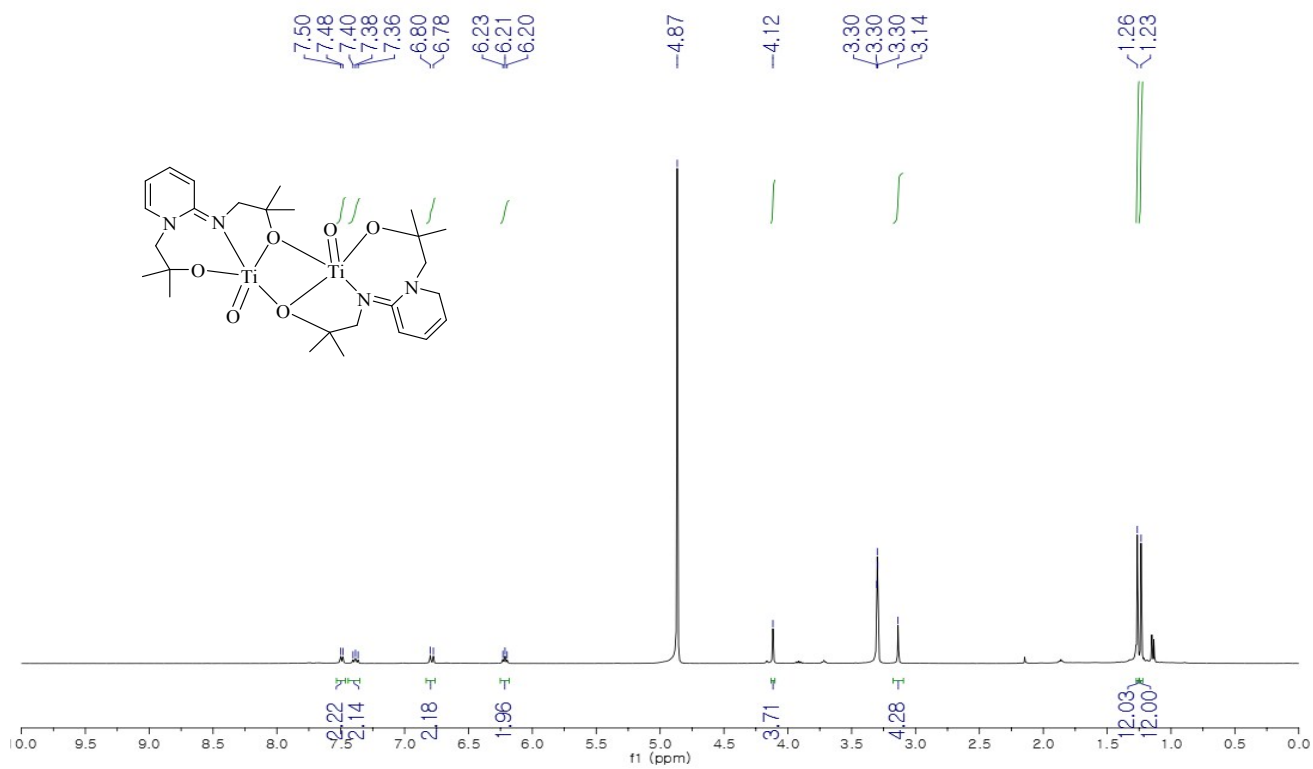

$$i\text{Pr})_2 \text{ (1)}$$
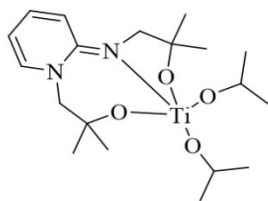

**Figure S18.**  $^1\text{H}$  NMR spectrum in  $\text{CD}_3\text{OD}$  in  $\text{CD}_3\text{OD}$  for the compound after dry air bubbling of  $\text{LTi}(\text{O}-i\text{Pr})_2$  (**1**)

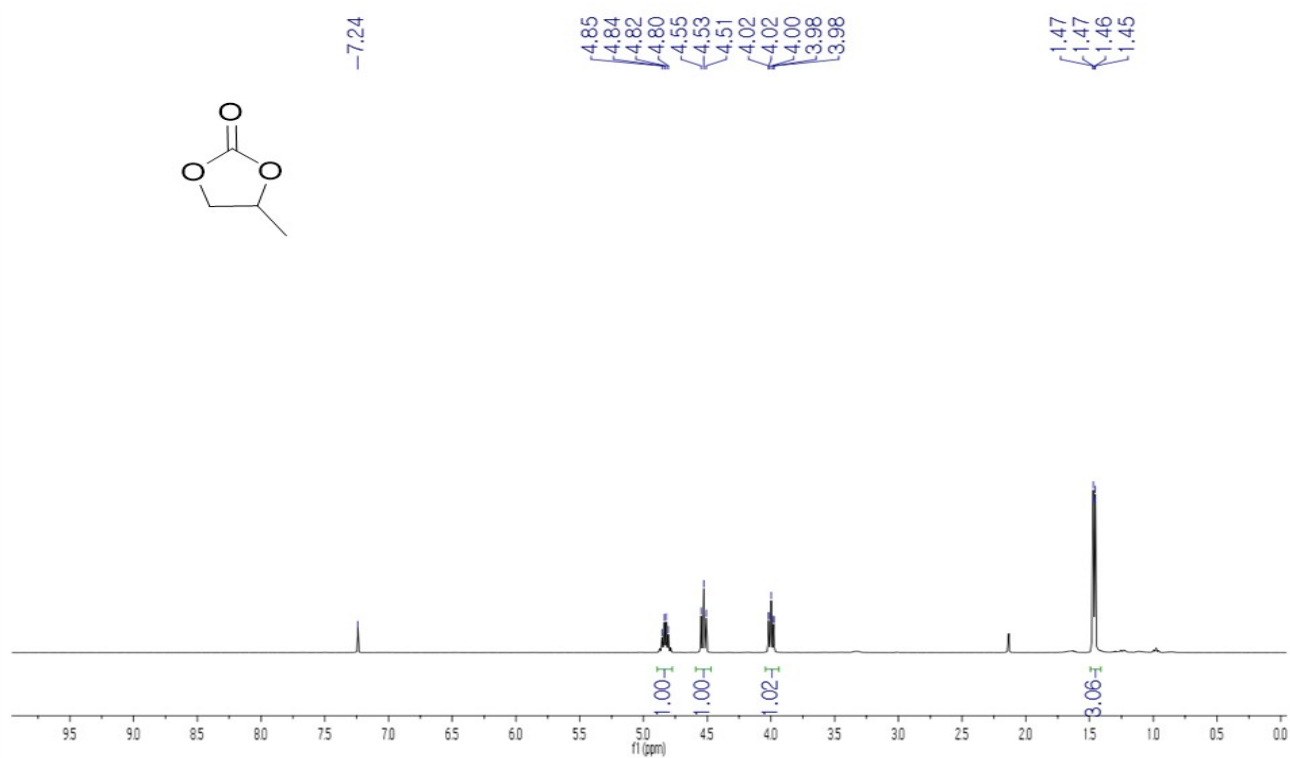

**Figure S19.** <sup>1</sup>H NMR spectrum of cyclic propylene carbonate (Table 3, entry 1)

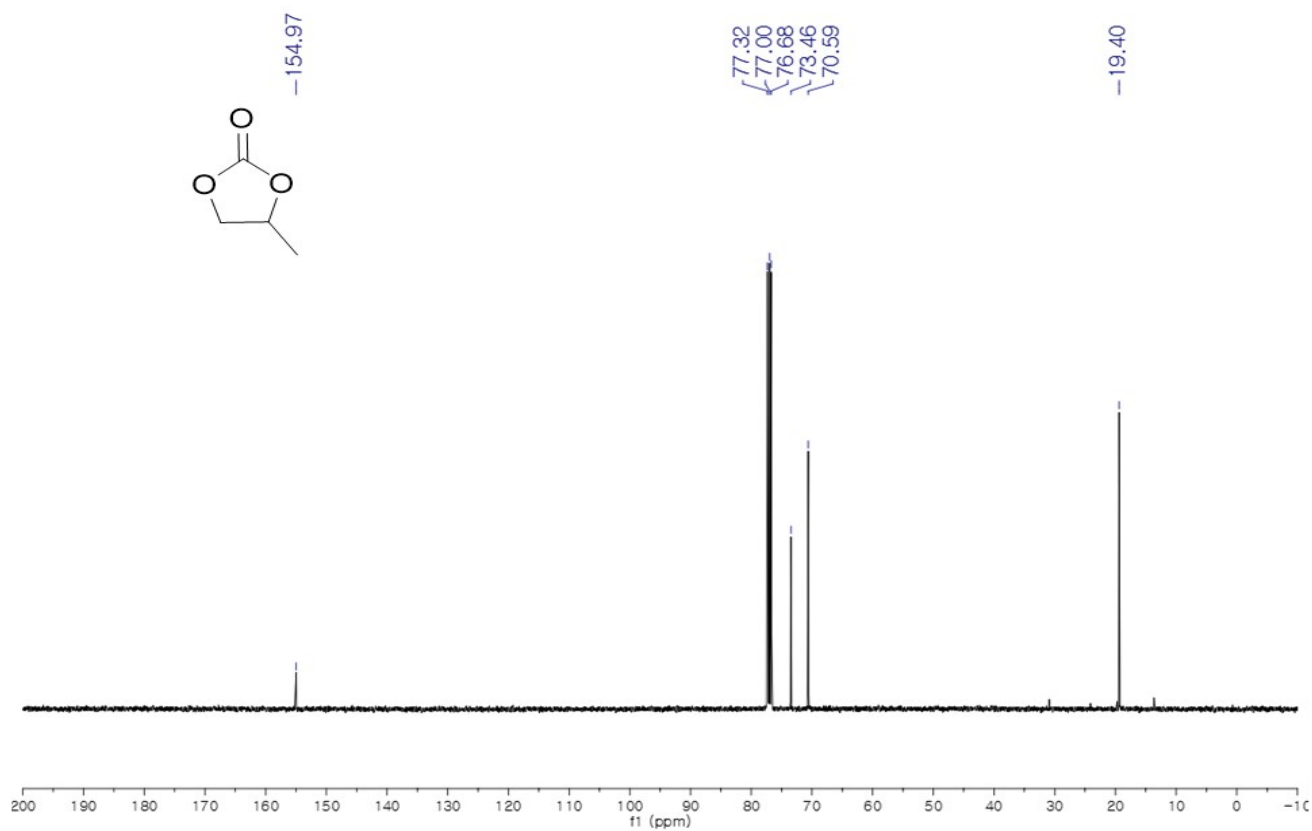

**Figure S20.** <sup>13</sup>C NMR spectrum of cyclic propylene carbonate (Table 3, entry 1)

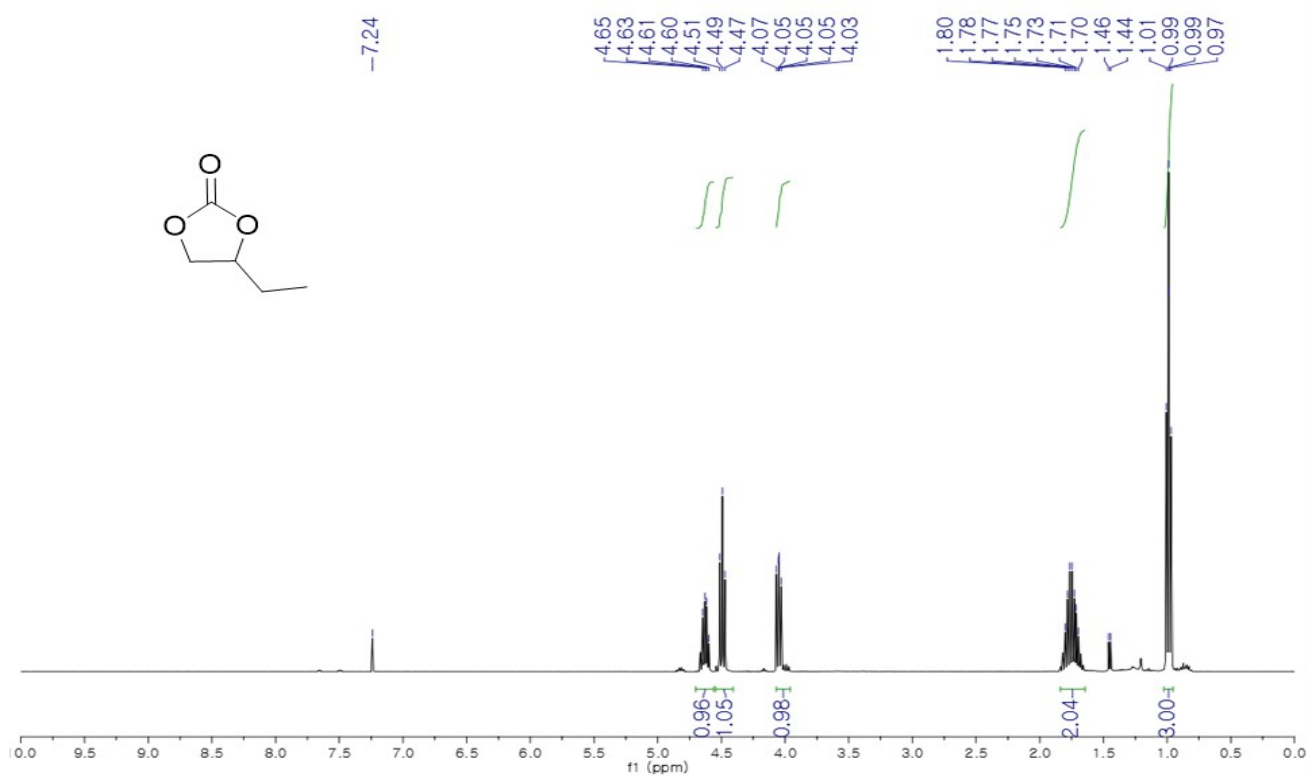

**Figure S21.** <sup>1</sup>H NMR spectrum of cyclic 1,2-butylene carbonate (Table 3, entry 2)

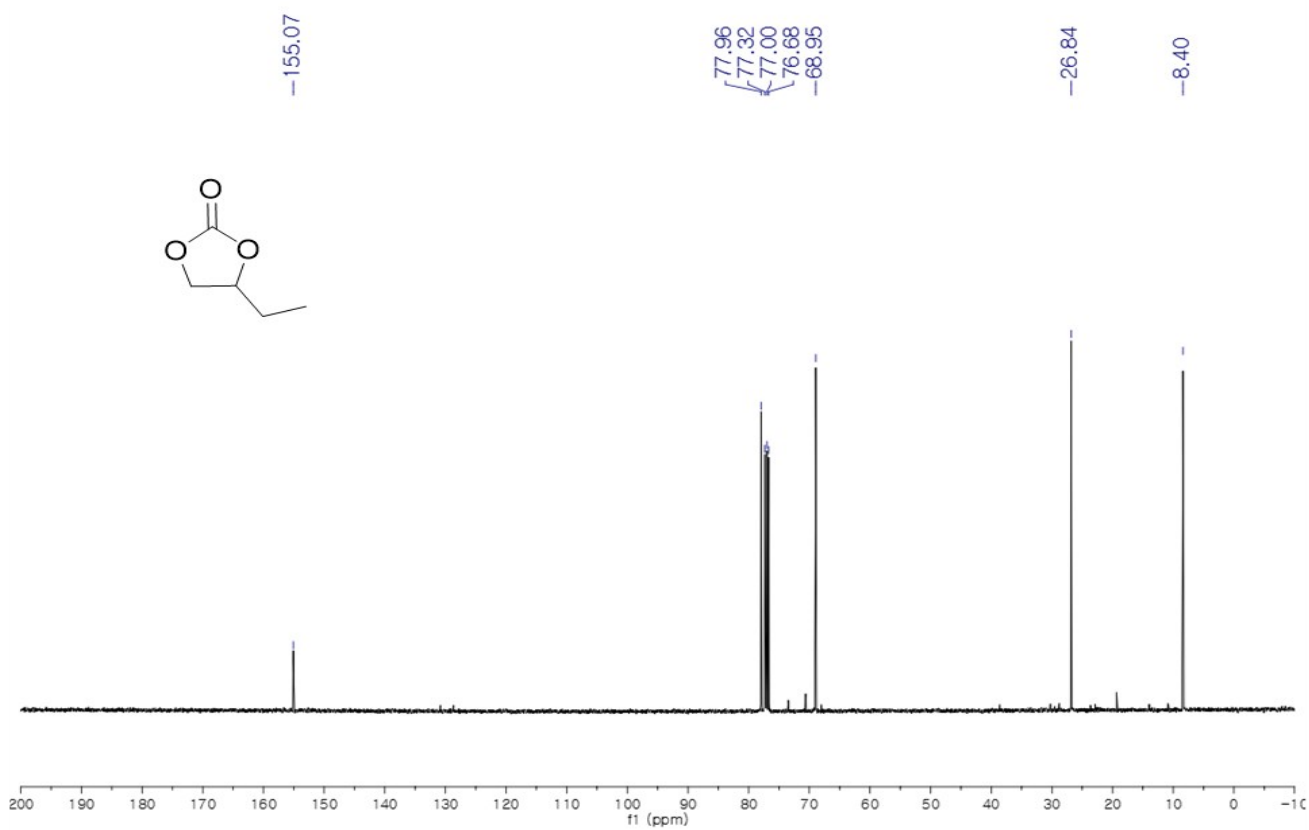

**Figure S22.** <sup>13</sup>C NMR spectrum of cyclic 1,2-butylene carbonate (Table 3, entry 2)

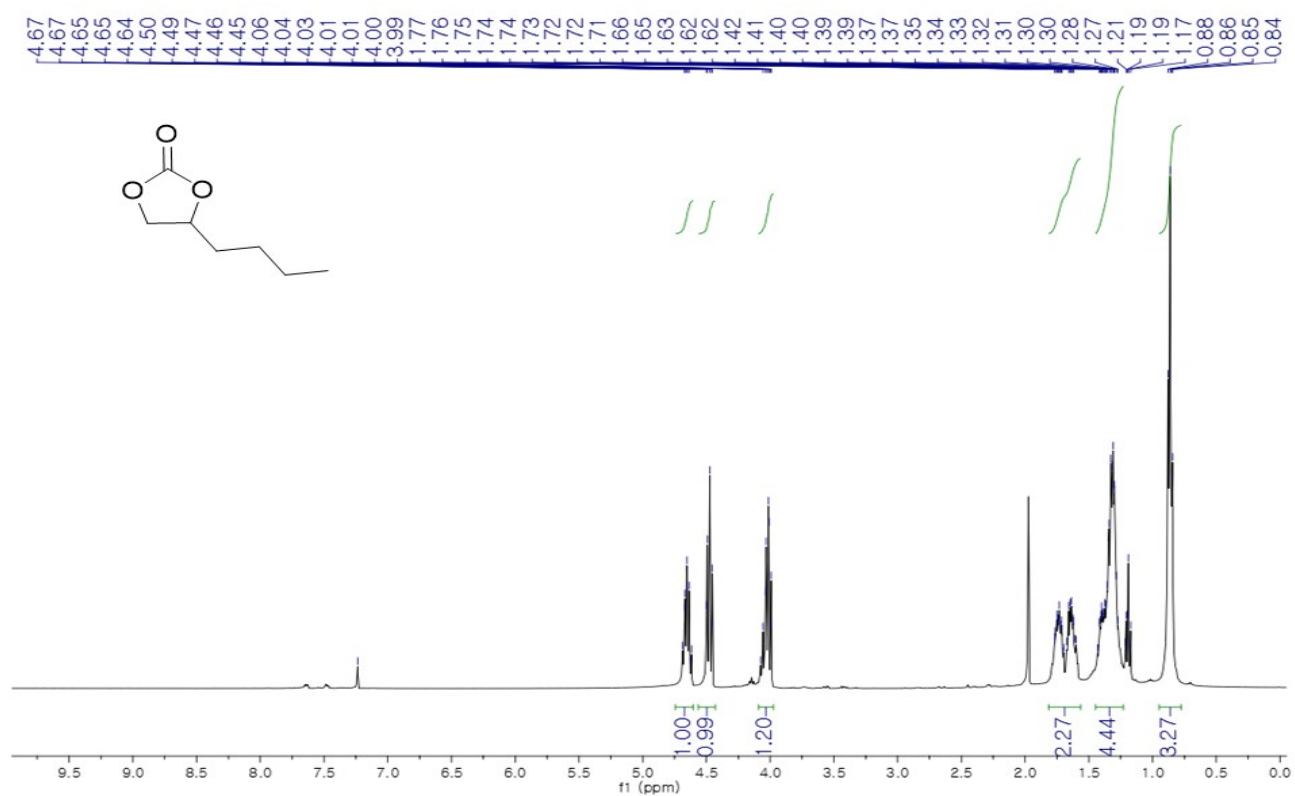

**Figure S23.**  $^1\text{H}$  NMR spectrum of cyclic 1,2-hexylene carbonate (Table 3, entry 3)

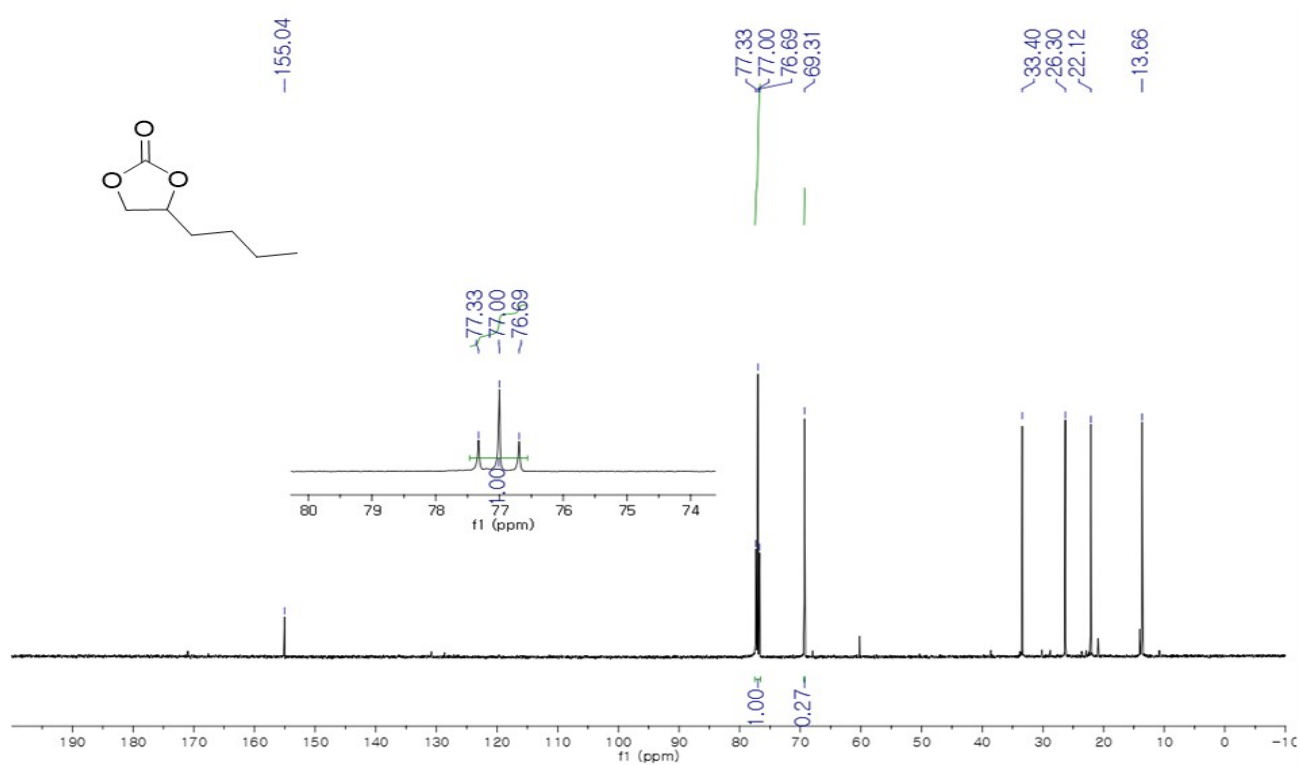

**Figure S24.**  $^{13}\text{C}$  NMR spectrum of cyclic 1,2-hexylene carbonate (Table 3, entry 3)

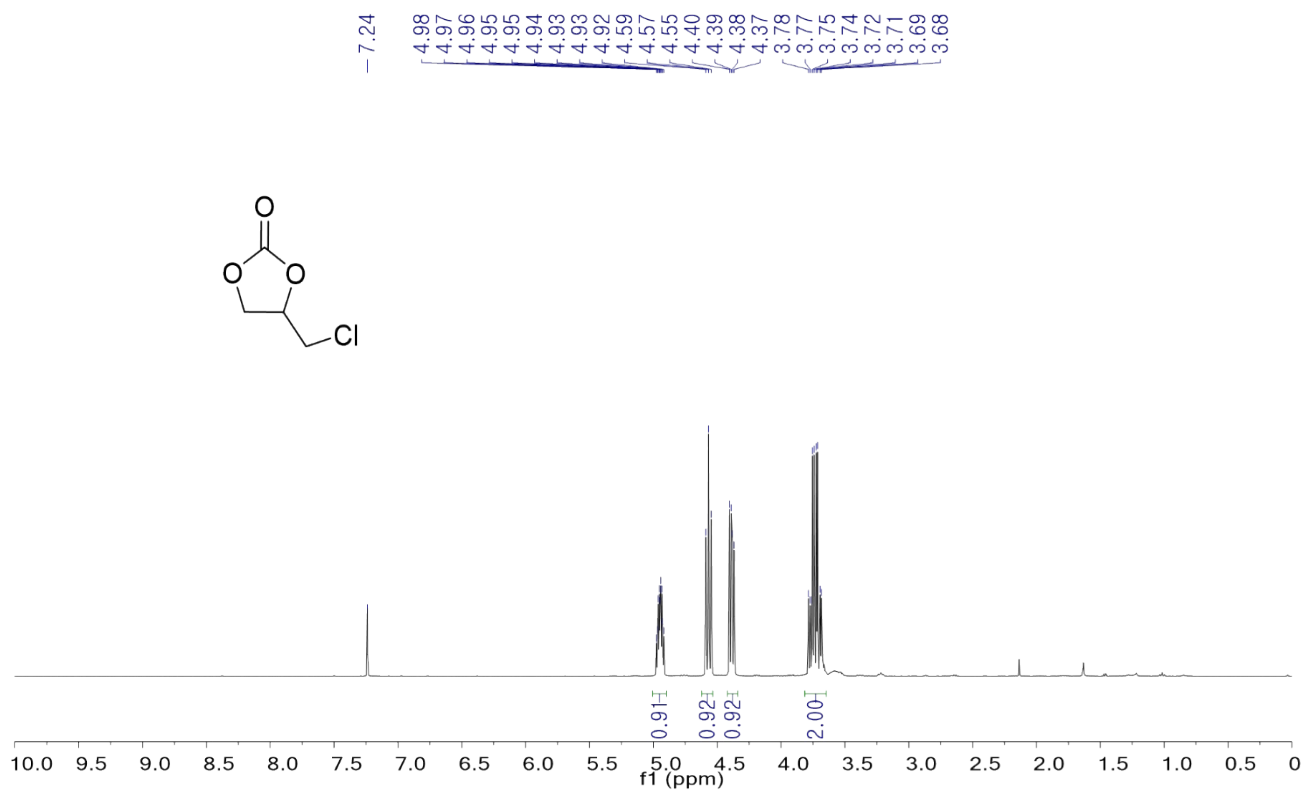

**Figure S25.** <sup>1</sup>H NMR spectrum of cyclic 3-chloropropylene carbonate (Table 3, entry 4)

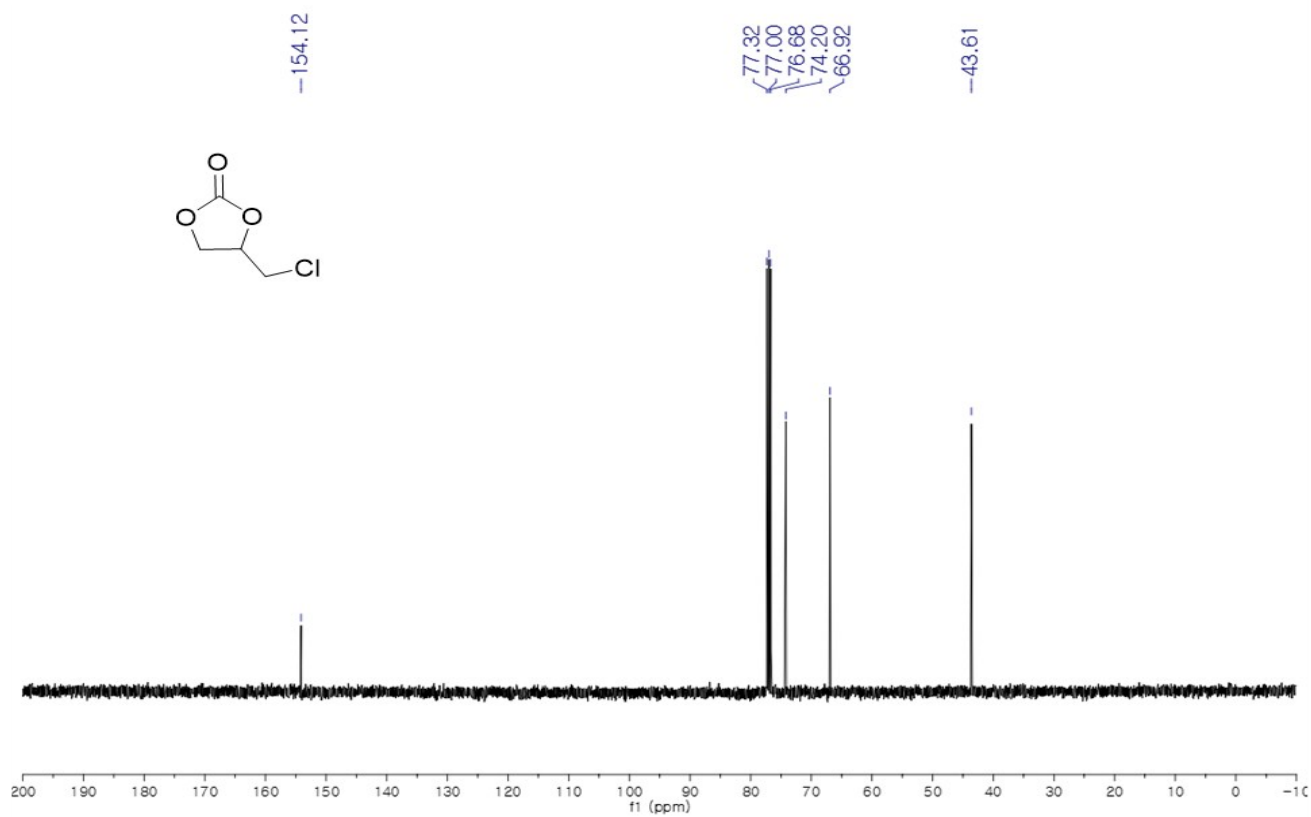

**Figure S26.** <sup>13</sup>C NMR spectrum of cyclic 3-chloropropylene carbonate (Table 3, entry 4)

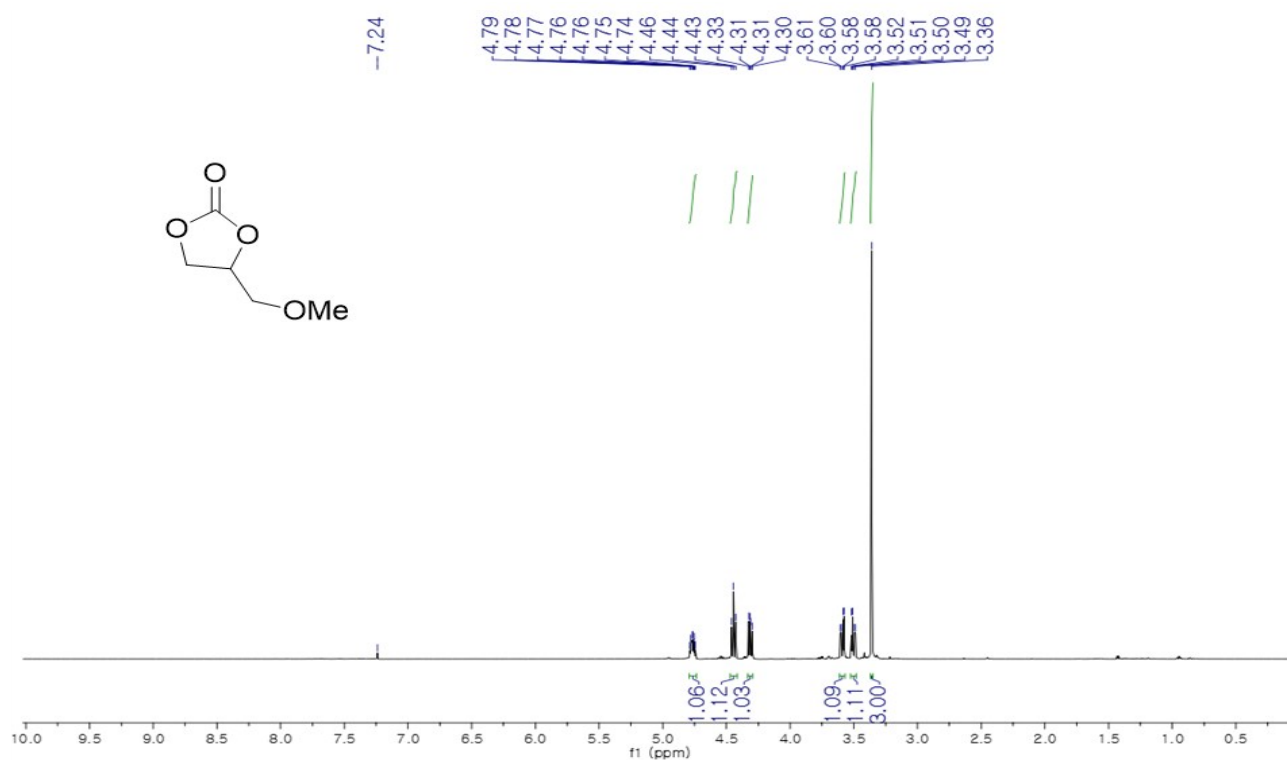

**Figure S27.** <sup>1</sup>H NMR spectrum of cyclic 3-methoxypropylene carbonate (Table 3, entry 5)

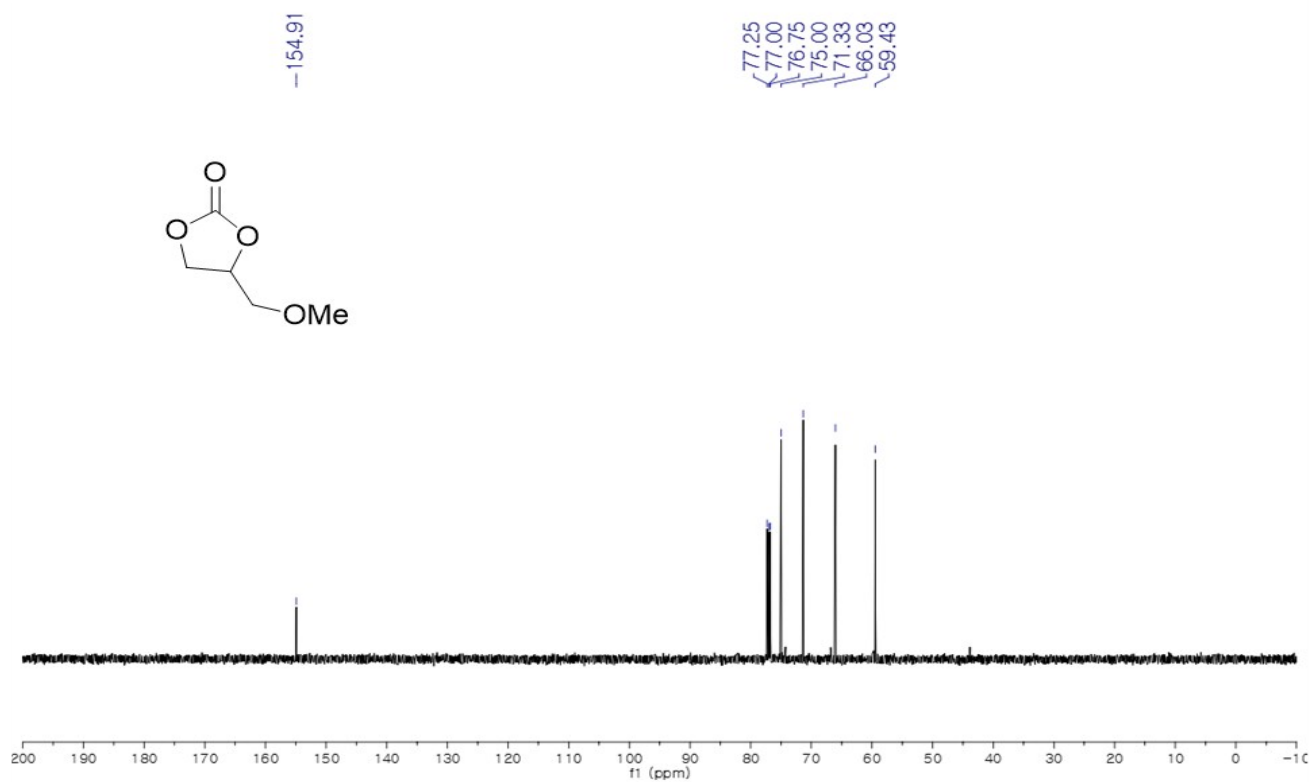

**Figure S28.** <sup>13</sup>C NMR spectrum of cyclic 3-methoxypropylene carbonate (Table 3, entry 5)

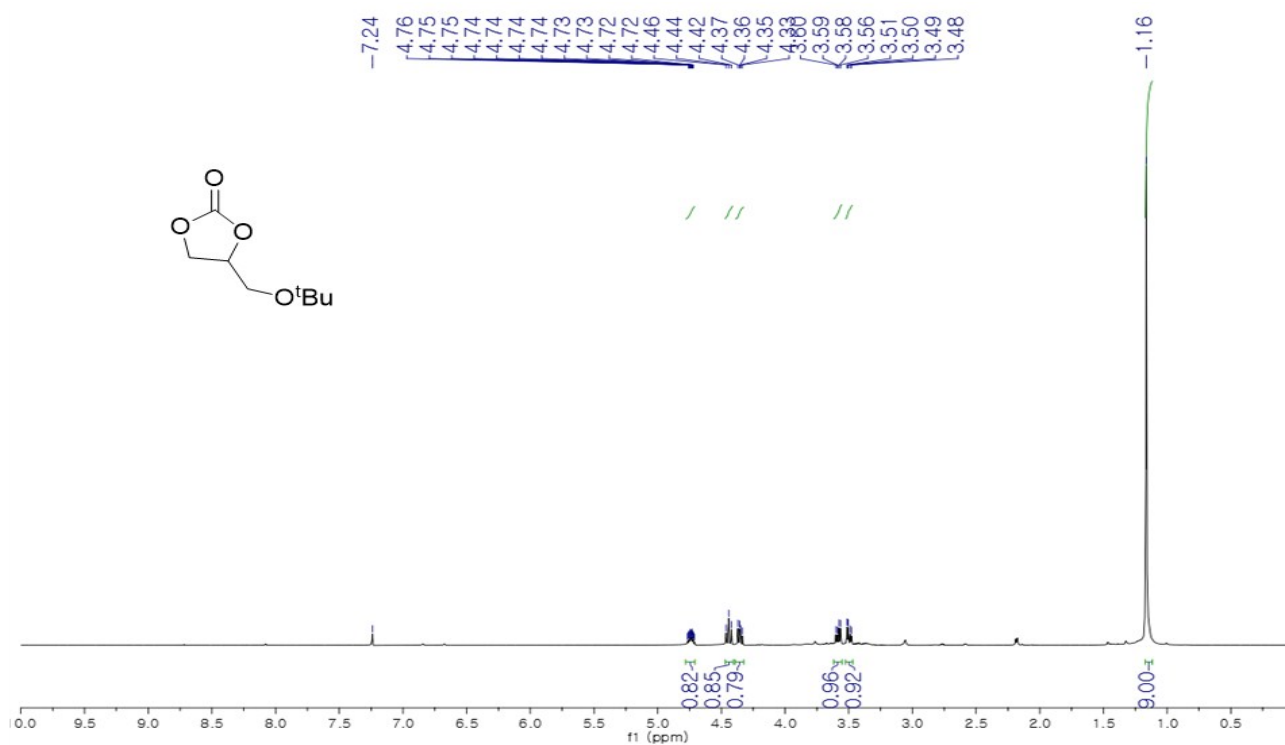

**Figure S29.** <sup>1</sup>H NMR spectrum of cyclic 3-t-butoxypropylene carbonate (Table 3, entry 6)

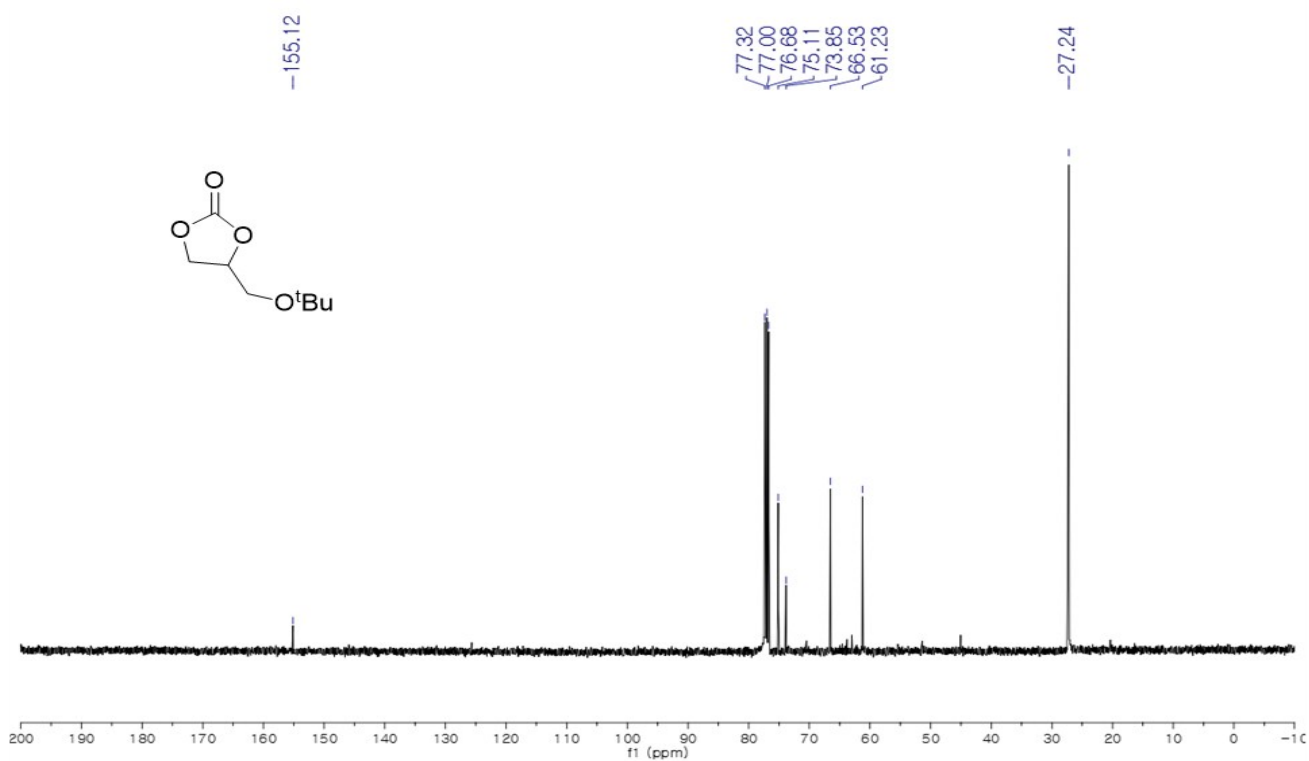

**Figure S30.** <sup>13</sup>C NMR spectrum of cyclic 3-t-butoxypropylene carbonate (Table 3, entry 6)

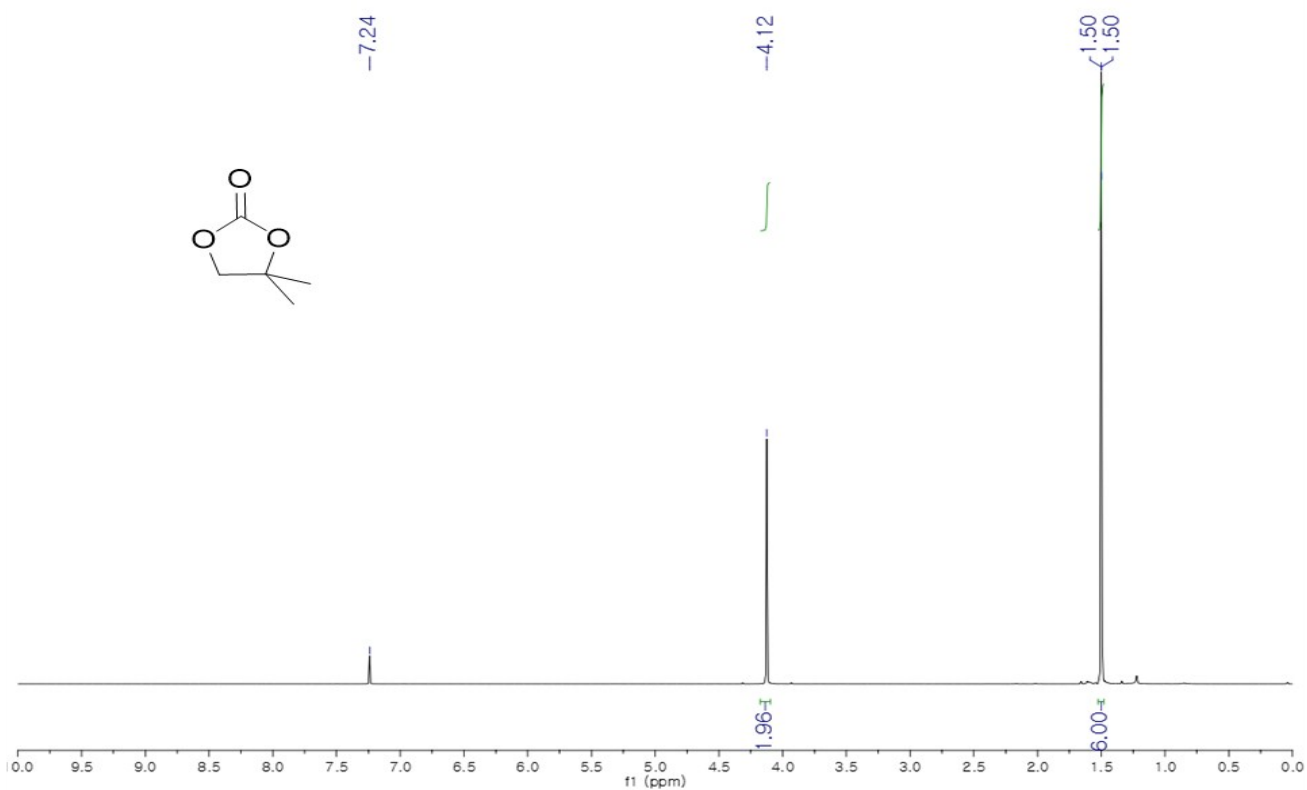

**Figure S31.** <sup>1</sup>H NMR spectrum of cyclic 1,1-dimethylethylene carbonate (Table 3, entry 7)

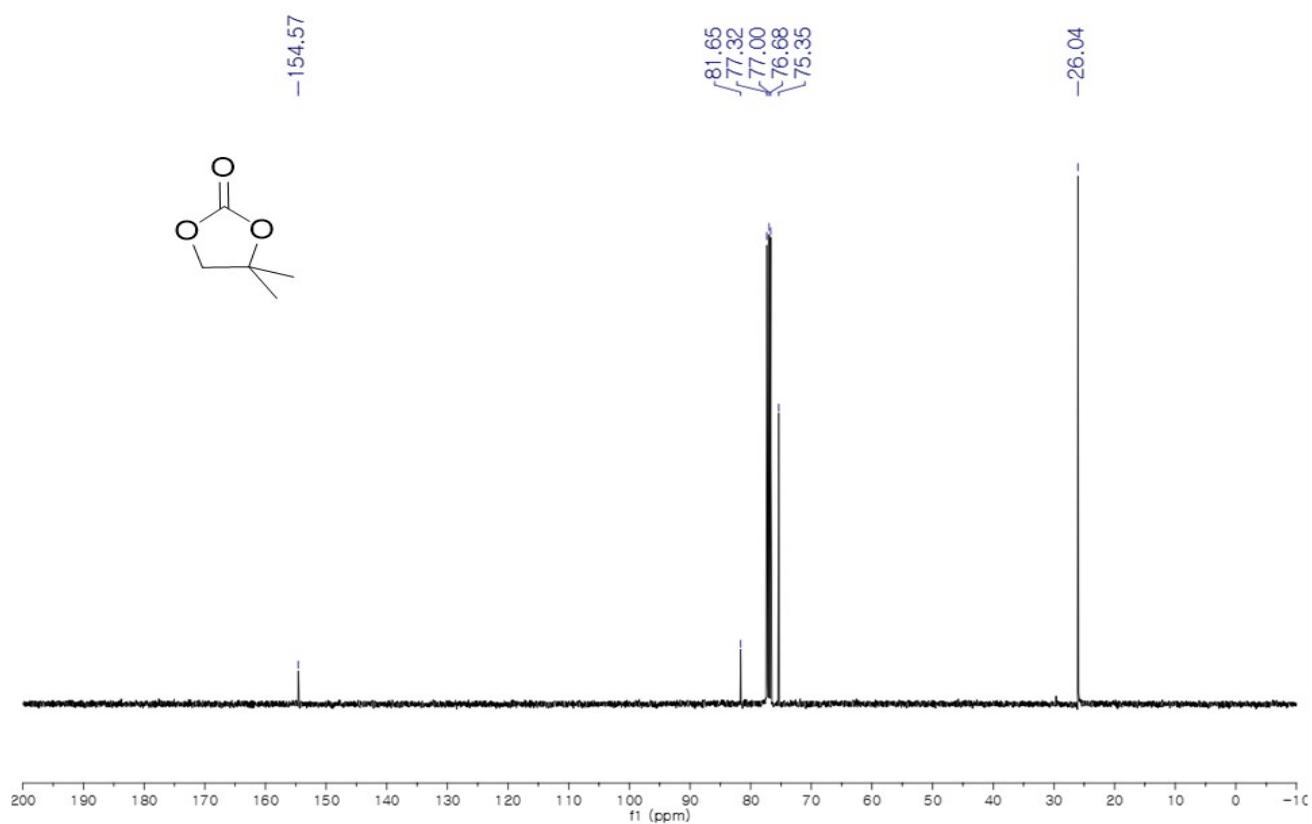

**Figure S32.** <sup>13</sup>C NMR spectrum of cyclic 1,1-dimethylethylene carbonate (Table 3, entry 7)
